# Supplementary material for: Enhanced oxygen reduction activity of bimetallic Pd–Ag alloy-supported on mesoporous cerium oxide electrocatalysts in alkaline media
Source: Royal Society of Chemistry journal article supplement (doi:10.1039/d1nj04102a), 2021-01-01
Supplement: d1nj04102a1.pdf [file d1nj04102a1.pdf]

## Enhanced Oxygen Reduction Activity of Bimetallic Pd-Ag Alloy Supported Mesoporous Cerium Oxide Electrocatalysts in alkaline Media

M. Sridharan, T. Maiyalagan\*,

*Electrochemical Energy Laboratory, Department of Chemistry,*

*SRM Institute of Science and Technology, Kattankulathur-603203, Tamil Nadu, India.*

### Supporting information

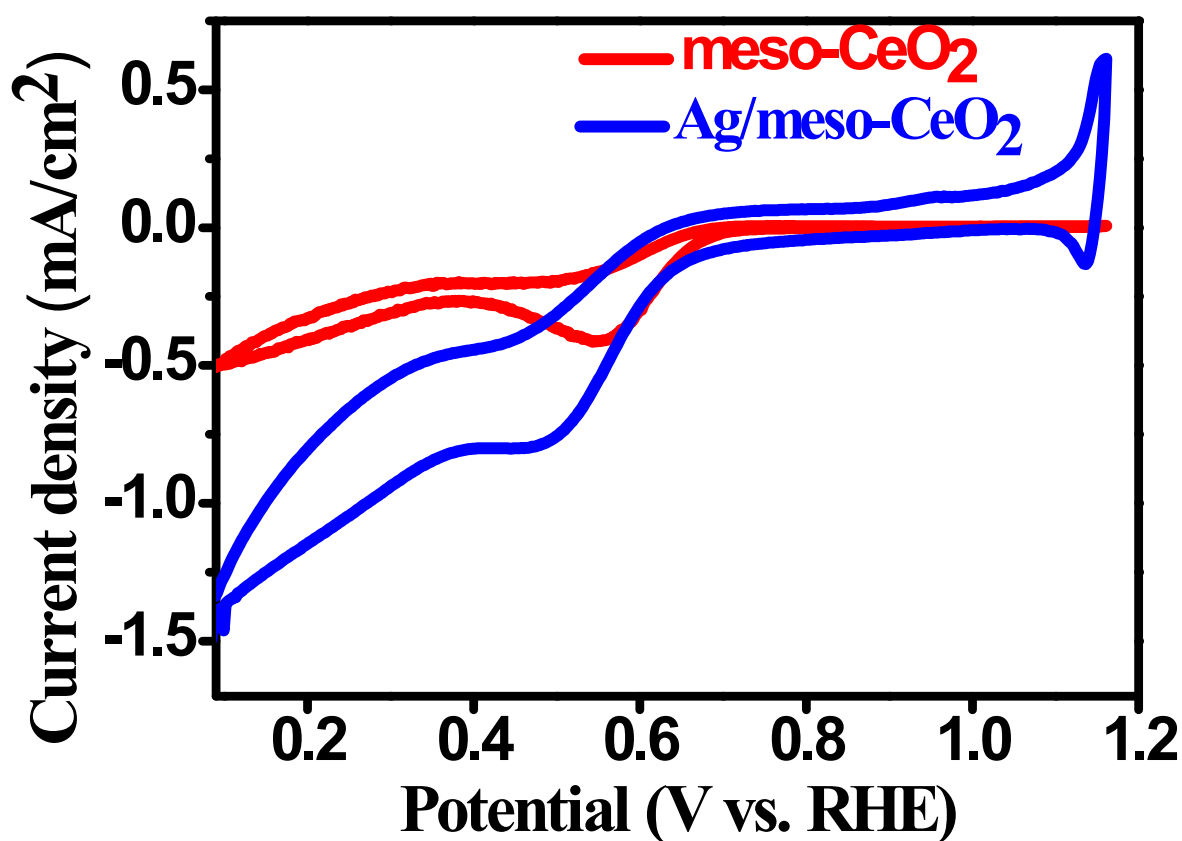

Fig. S1. CV curves of meso-CeO<sub>2</sub> and Ag/meso-CeO<sub>2</sub> in O<sub>2</sub> saturated 0.1 M KOH solution at 1600 rpm

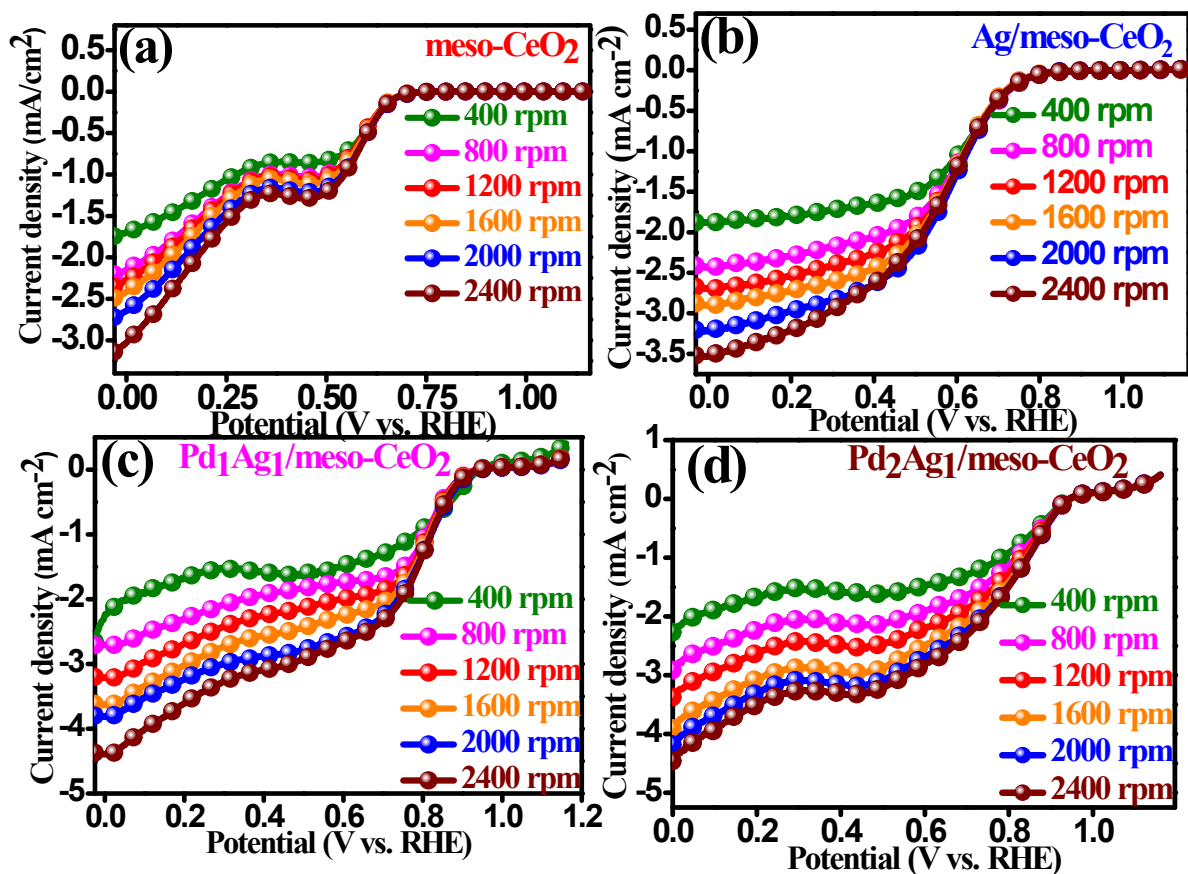

Fig. S2. LSV curves of the (a) meso-CeO<sub>2</sub>, (b) Ag/meso-CeO<sub>2</sub>, (c) Pd<sub>1</sub>Ag<sub>1</sub>/meso-CeO<sub>2</sub>, (d) Pd<sub>2</sub>Ag<sub>1</sub>/meso-CeO<sub>2</sub> in 0.1 M KOH saturated with O<sub>2</sub> at various rotating rates

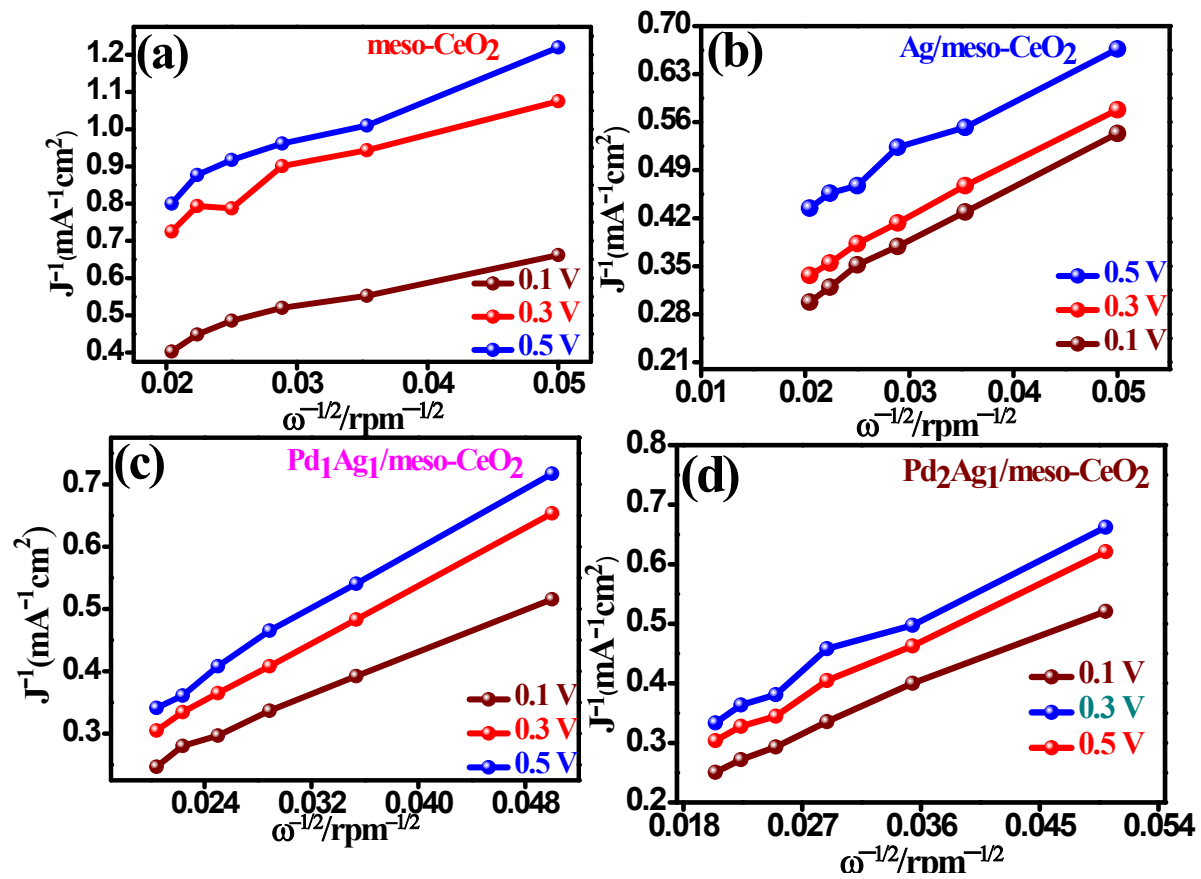

Fig. S3 KL-plots of (a) meso-CeO<sub>2</sub>, (b) Ag/meso-CeO<sub>2</sub>, (c) Pd<sub>1</sub>Ag<sub>1</sub>/meso-CeO<sub>2</sub>, (d) Pd<sub>2</sub>Ag<sub>1</sub>/meso-CeO<sub>2</sub>

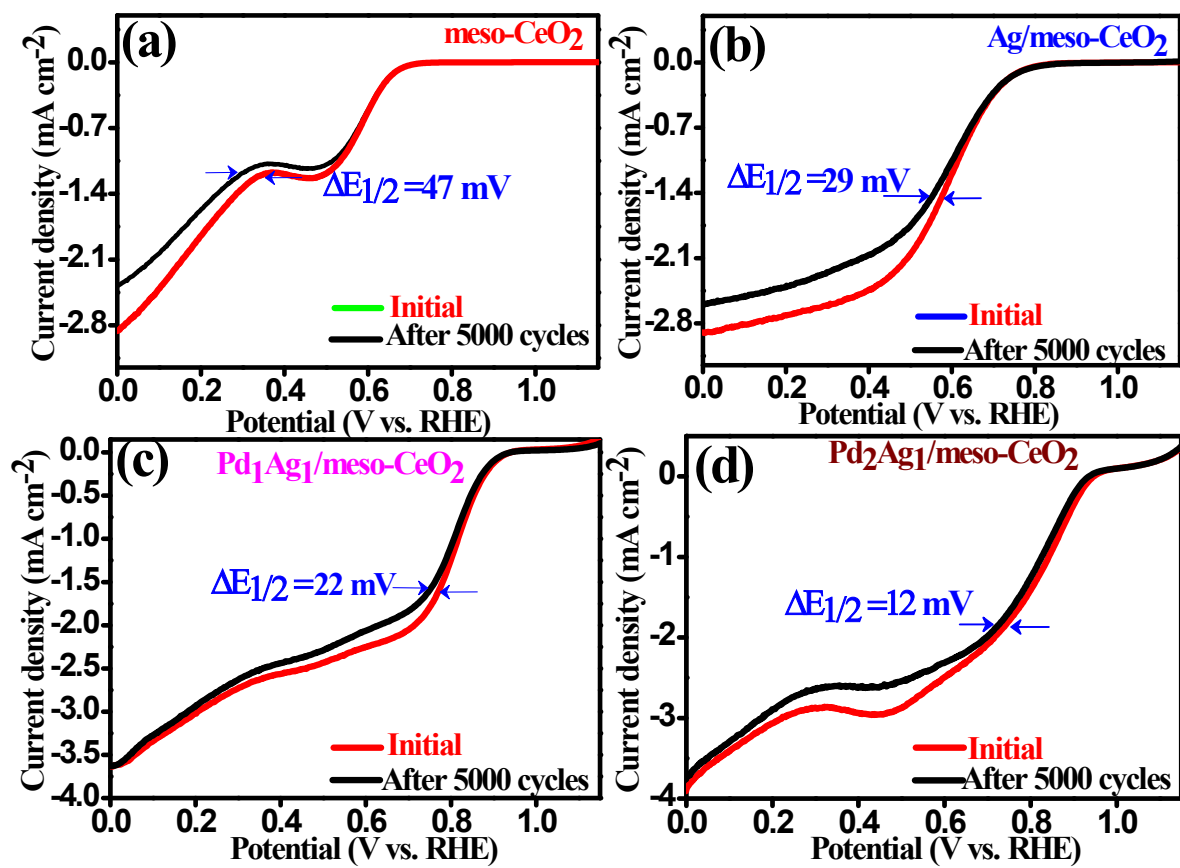

Fig. S4 LSV curves of (a) meso-CeO<sub>2</sub>, (b) Ag/meso-CeO<sub>2</sub>, (c) Pd<sub>1</sub>Ag<sub>1</sub>/meso-CeO<sub>2</sub>, (d) Pd<sub>2</sub>Ag<sub>1</sub>/meso-CeO<sub>2</sub> before and after 5000 cycles at 1600rpm.

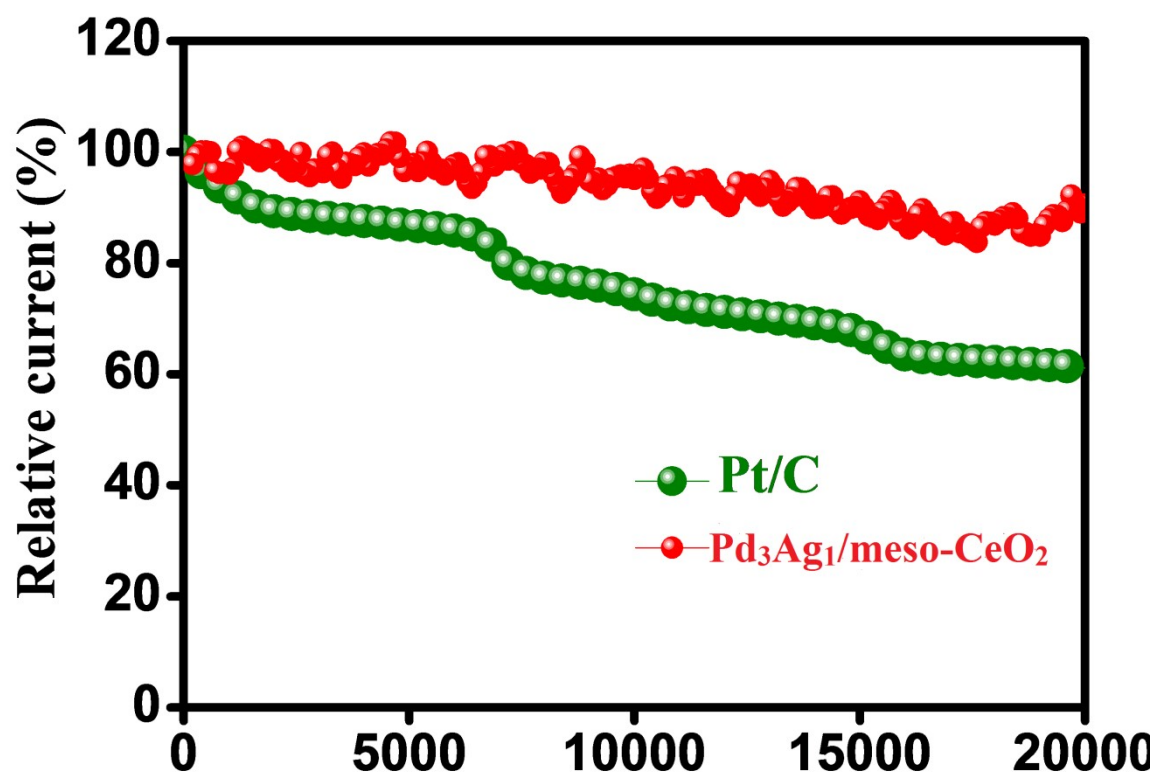

Fig. S5 Chronoamperometric study of the Pd<sub>3</sub>Ag<sub>1</sub>/meso-CeO<sub>2</sub> at 0.85 (V vs RHE)

| S.No      | Electrocatalyst                                          | ECSA<br>(m <sup>2</sup> g <sup>-1</sup> ) | E <sub>o</sub><br>(V<br>versus<br>RHE) | E <sub>1/2</sub><br>(V versus<br>RHE) | MA<br>(mA/mg) | References          |
|-----------|----------------------------------------------------------|-------------------------------------------|----------------------------------------|---------------------------------------|---------------|---------------------|
| 1         | PdZn-disordered                                          | 48                                        | 0.93                                   | 0.74                                  | 8.30          | S1                  |
| 2         | PdZn-ordered                                             | 55                                        | 0.97                                   | 0.81                                  | 24.4          | S1                  |
| 3         | PdZn-Core-Shell                                          | 90                                        | 0.98                                   | 0.82                                  | 44.0          | S1                  |
| 4         | CuPd nanocube                                            | 41.8                                      | -                                      | 0.81                                  | 130           | S2                  |
| 5         | Pd <sub>4</sub> Co/C (Core-Shell)                        | 35                                        | -                                      | -                                     | 173           | S3                  |
| 6         | Pt/CeO <sub>2</sub> /CNT                                 | 39.3                                      | -                                      | 0.85                                  | -             | S4                  |
| 7         | Ag-CeO <sub>2</sub> /VXC-72                              | -                                         | 0.707                                  | 0.90                                  | -             | S5                  |
| 8         | Pd-CeO <sub>2</sub> -NR/C                                | 25.5                                      | 0.97                                   |                                       | -             | S6                  |
| 9         | Pd/C                                                     | 103.7                                     | 0.95                                   | 0.76                                  | 39            | S1                  |
| <b>10</b> | <b>Pd<sub>3</sub>Ag<sub>1</sub>/meso-CeO<sub>2</sub></b> | <b>76</b>                                 | <b>0.97</b>                            | <b>0.86</b>                           | <b>157</b>    | <b>Present work</b> |

Table S1. Comparison of ORR activity of Pd<sub>3</sub>Ag<sub>1</sub>/meso-CeO<sub>2</sub> with Pd and CeO<sub>2</sub> based catalyst.

## References

[S1] Yang, Hongyu, Kai Wang, Zhenghua Tang, Zhen Liu, and Shaowei Chen, Bimetallic PdZn nanoparticles for oxygen reduction reaction in alkaline medium: The effects of surface structure, *Journal of Catalysis*, 2020, **382**, 181-191. <https://doi.org/10.1016/j.jcat.2019.12.018>

[S2] Zhang, Li, Fei Hou, and Yiwei Tan, Shape-tailoring of CuPd nanocrystals for enhancement of electro-catalytic activity in oxygen reduction reaction, *Chemical Communications*, 2012, **57**, 7152-7154. <https://doi.org/10.1039/C2CC33107A>

[S3] Jang, Ji-Hoon, Chanho Pak, and Young-Uk Kwon, Ultrasound-assisted polyol synthesis and electrocatalytic characterization of Pd<sub>x</sub>Co alloy and core-shell nanoparticles, *Journal of Power Sources*, 2012, **201**, 179-183. <https://doi.org/10.1016/j.jpowsour.2011.10.139>

[S4] Chen, Jinwei, Zhenjie Li, Yihan Chen, Jie Zhang, Yan Luo, Gang Wang, and Ruilin Wang, An enhanced activity of Pt/CeO<sub>2</sub>/CNT triple junction interface catalyst prepared by

atomic layer deposition for oxygen reduction reaction, *Chemical Physics Letters*, 2020, **755**, 137793. <https://doi.org/10.1016/j.cplett.2020.137793>

[S5] Sun, Shanshan, Yejian Xue, Qin Wang, Shihua Li, Heran Huang, He Miao, and Zhaoping Liu, Electrocatalytic activity of silver decorated ceria microspheres for the oxygen reduction reaction and their application in aluminium–air batteries, *Chemical Communications*, 2017, **53**, 7921-7924. <https://doi.org/10.1039/C7CC03691D>

[S6] Meléndez-González, P. C., Maria Esther Sánchez-Castro, Ivonne Liliana Alonso-Lemus, R. Pérez-Hernández, Beatriz Escobar-Morales, A. M. Garay-Tapia, and F. J. Rodríguez-Varela, Highly Active Pd-CeO<sub>2</sub>-NR/C (Cerium Oxide Nanorods) Bifunctional Nanocatalysts with Remarkable Stability for the Ethanol Oxidation and Oxygen Reduction Reactions in Alkaline Media, *ECS Transactions*, 2019, **92**, 671. <https://doi.org/10.1149/09208.0671ecst>.
